# Supplementary material for: Design and Evaluation of Dissolvable Microneedles for Treating Atopic Dermatitis
Source: MDPI journal article supplement (doi:10.3390/pharmaceutics15041109), 2023-03-31
Supplement: s1 [file s1]

## Supporting information

# Design and Evaluation of Dissolvable Dexamethasone Microneedles for Treating Atopic Dermatitis

Noa Ben David<sup>a</sup>, Yuval Richtman<sup>a</sup>, Adi Gross<sup>a</sup>, Ruba Ibrahim<sup>b,c</sup>, Abraham Nyska<sup>d</sup>, Yuval Ramot\*<sup>b,c</sup> and Boaz Mizrahi\*<sup>a</sup>

<sup>a</sup>Technion- Israel Institute of Technology, Faculty of Biotechnology and Food Engineering, Haifa, 3200003, Israel.

<sup>b</sup>Department of Dermatology, Hadassah Medical Center, Jerusalem, 9112001, Israel

<sup>c</sup>The Faculty of Medicine, Hebrew University of Jerusalem, Jerusalem, 9112001, Israel

<sup>d</sup>Sackler School of Medicine, Tel Aviv University, and Consultant in Toxicologic Pathology, Tel Aviv, 6200515, Israel.

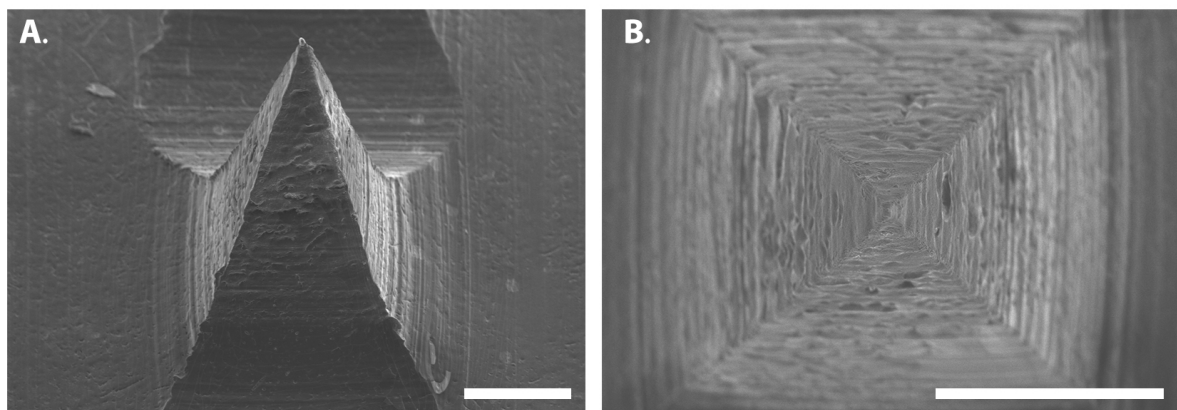

**Figure S1.** Representative SEM images of well-structured empty MNs Scale bar: 100 $\mu$ m.

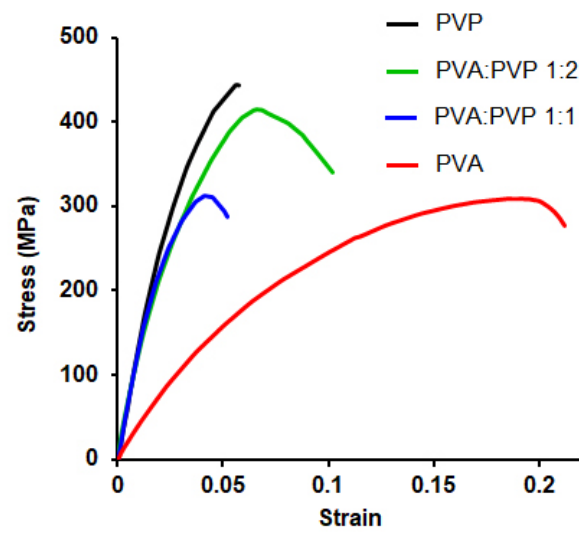

**Figure S2.** Stress strain behavior of PVA/PVA microneedles in different ratios.

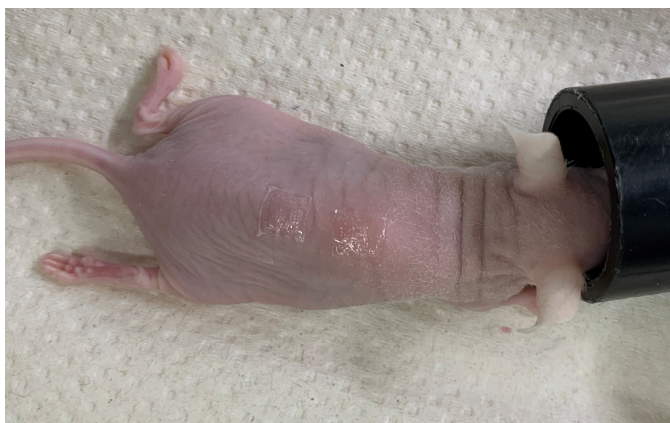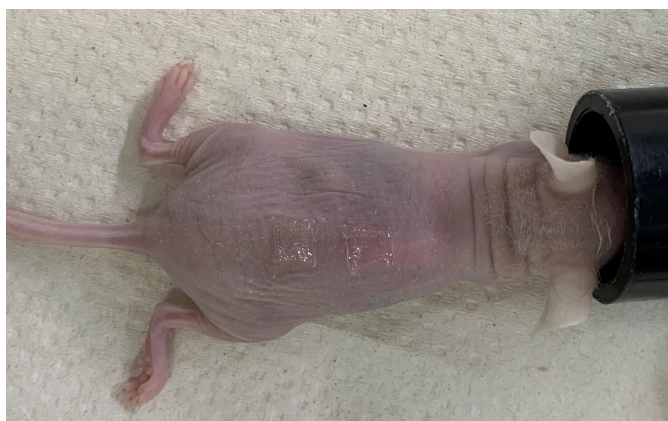

**Figure S3.** Representative images of MNs 1 h after administration.

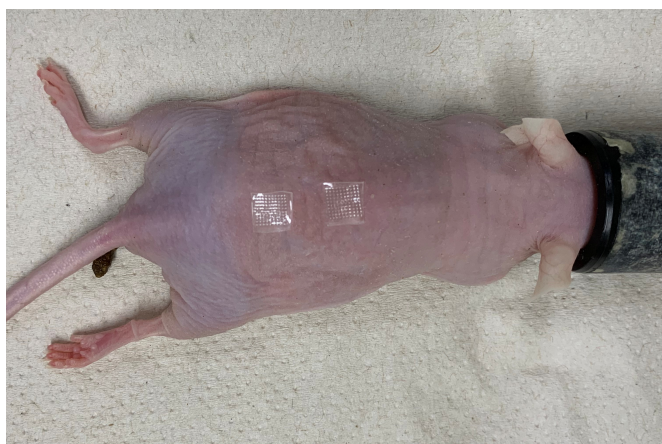

**Figure S4.** Representative image of MNs placed side by side in the center of the lesion (Not treated, day 13).
